# Supplementary material for: Regulated synthesis of an Au NB-DT@Ag bimetallic core-molecule–shell nanostructure for reliable SERS detection
Source: Royal Society of Chemistry journal article supplement (doi:10.1039/d3ay00661a), 2023-01-01
Supplement: d3ay00661a1.pdf [file d3ay00661a1.pdf]

## Supporting information

for

### Regulated Synthesis of Au NB-DT@Ag Bimetallic Core-Molecule-Shell Nanostructure for Reliable SERS Detection.

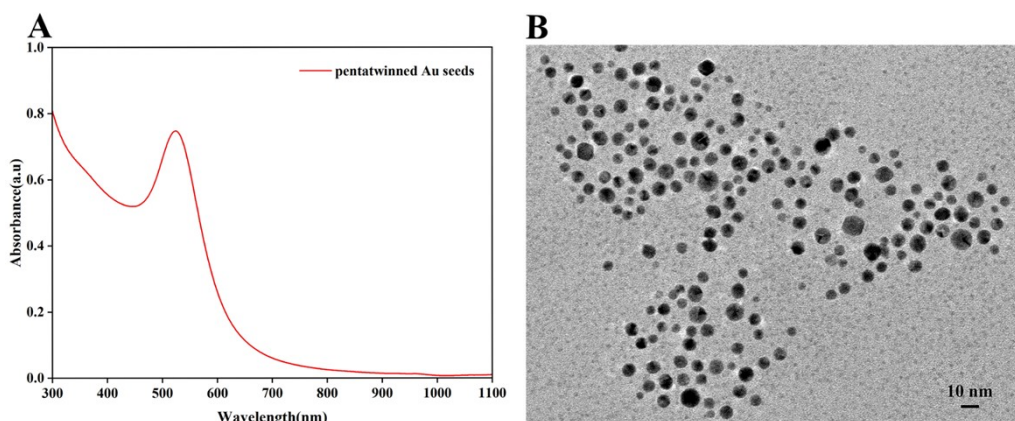

Figure S1. (A) UV-vis spectrum of Au seeds and (B) TEM image of Au seeds.

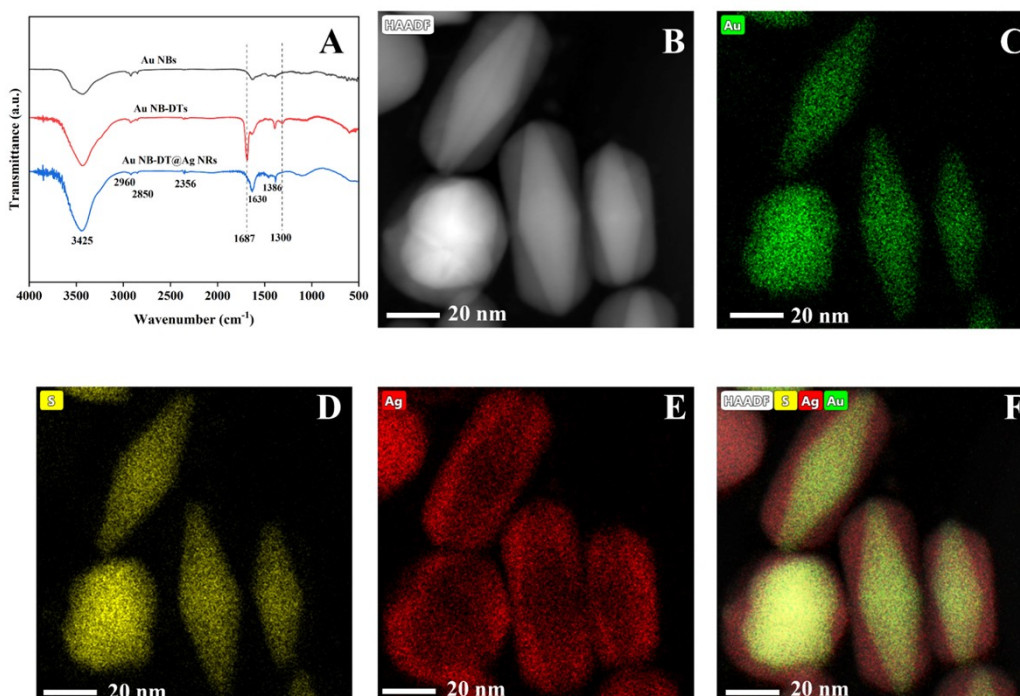

Figure S2. (A) FTIR spectra of Au NBs, Au NB-DTs and Au NB-DT@Ag NRs; (B-F)TEM images and elements mapping of Au NB-DT@Ag NRs;

Table S1: Comparison of enhancement factors of Au@Ag core-shell SERS base materials in recent years

| Substrate                              | Analyte | AEF                  | Ref       |
|----------------------------------------|---------|----------------------|-----------|
| Au @Fe <sub>3</sub> O <sub>4</sub> NPs | MG      | 1.10×10 <sup>5</sup> | 1         |
| Ag/PDMS                                | MG      | 2.06×10 <sup>5</sup> | 2         |
| Au NP@GQDs                             | MG      | 1.70×10 <sup>3</sup> | 3         |
| ZnO NR@Au                              | MG      | 5.30×10 <sup>5</sup> | 4         |
| Fe <sub>3</sub> O <sub>4</sub> @Ag     | MG      | 1.00×10 <sup>5</sup> | 5         |
| Au NB-DT@Ag NRs                        | MG      | 3.73×10 <sup>5</sup> | This work |

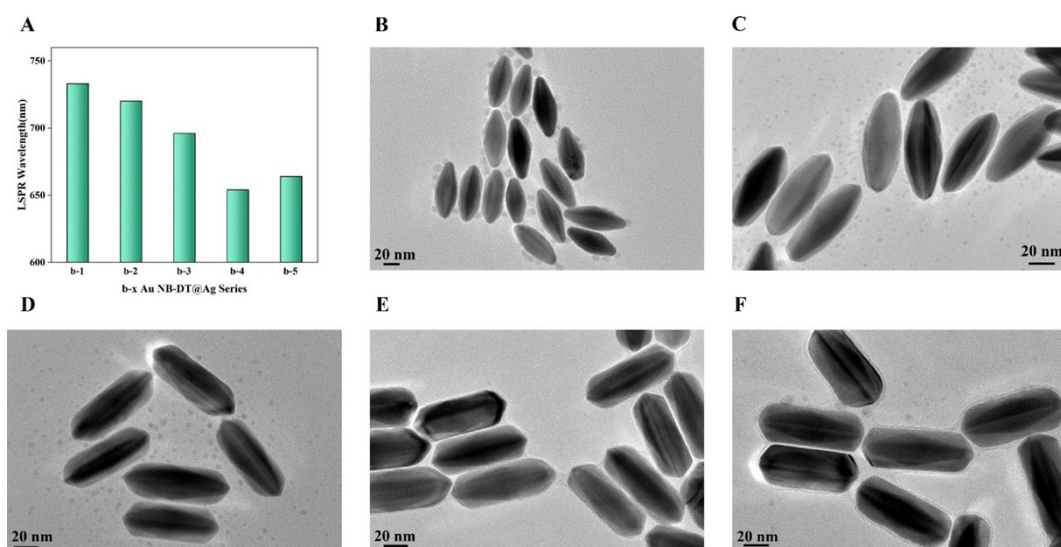

Figure S3: UV-vis spectra and TEM images of Au NB-DT@Ag NRs with controlled Ag shell thickness; (A) UV-vis spectra of b-1~b-5 Au NB-DT@Ag NRs; (B~F) TEM images of Au NB-DT@Ag NRs (B) b-1; (C) b-2 ; (D) b-3 ; (E) b-4 ; (F) b-5 ;

Table S2: Comparison of the Au NB-DT@Ag with recent reported SERS substrates used for the analysis of MG

| SERS Substrate                         | Analyte | LOD (mol/L)          | AEF                | Ref       |
|----------------------------------------|---------|----------------------|--------------------|-----------|
| Ag-coated PDMS                         | MG      | $1.0 \times 10^{-7}$ | $2.06 \times 10^5$ | 2         |
| Au@Ag NCs                              | MG      | $5.0 \times 10^{-9}$ | -                  | 6         |
| Au NP/HMM                              | MG      | $1.0 \times 10^{-8}$ | $1.56 \times 10^5$ | 7         |
| Au Nanowires                           | MG      | $1.0 \times 10^{-6}$ | -                  | 8         |
| Au NPs/GDY/CC                          | MG      | $1.0 \times 10^{-9}$ | $5.4 \times 10^5$  | 9         |
| Au-coated ZnO NRs                      | MG      | $5.0 \times 10^{-9}$ | $5.3 \times 10^5$  | 10        |
| Fe <sub>3</sub> O <sub>4</sub> @Au MCS | MG      | $1.0 \times 10^{-7}$ | $1.10 \times 10^5$ | 11        |
| Au NB-DT@Ag NRs                        | MG      | $5.0 \times 10^{-9}$ | $3.73 \times 10^5$ | This work |

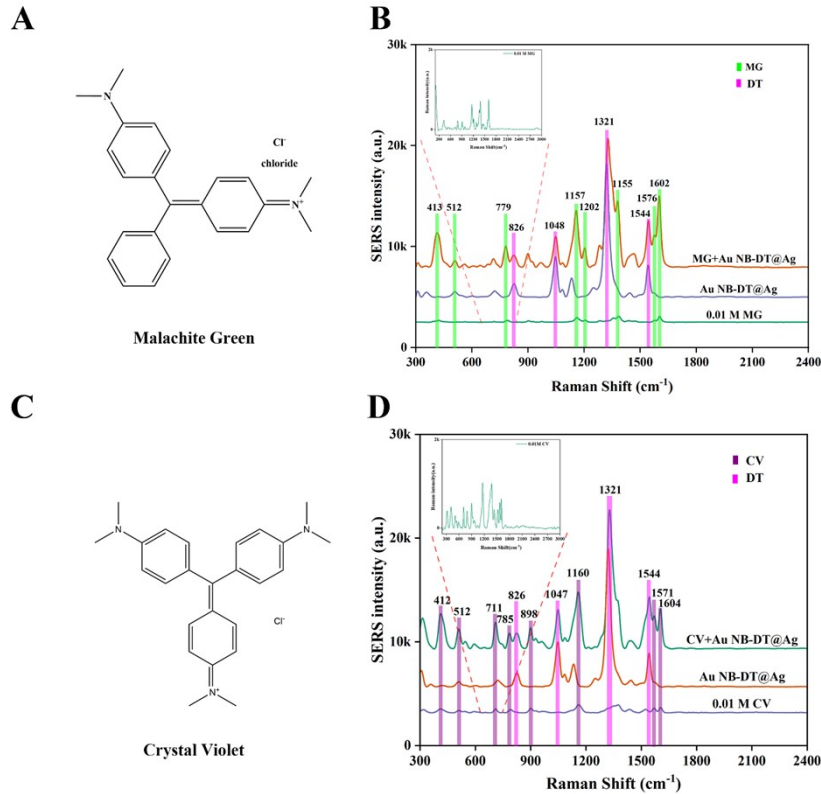

Figure S4. (A) Molecule structures of MG; (B) Raman spectra of Au NB-DT@Ag NRs and Au NB-DT@Ag NRs+MG and 0.01M MG solution, inserted the Raman spectrum of MG (C) Molecule structures of CV; (D) Raman spectra of Au NB-DT@Ag NRs and Au NB-DT@Ag NRs+CV and 0.01M CV solution, inserted the Raman spectrum of CV.

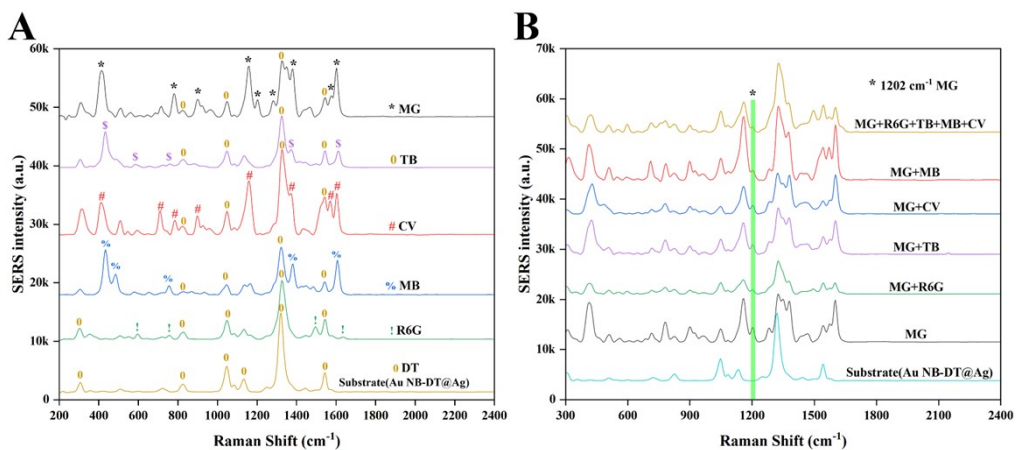

Figure S5. (A) SERS spectra of MG, TB, CV, MB and R6G with the substrate (Au NB-DT@Ag). (B) SERS spectra of MG+MB, MG+CV, MG+TB, MG+R6G mixtures, MG with the substrate and the blank substrate.

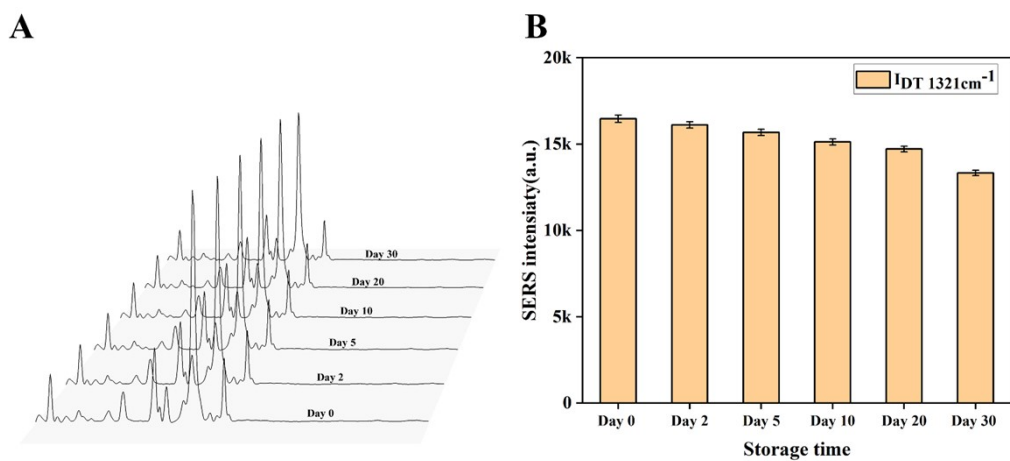

Figure S6: (A) SERS intensity of DT at  $1321\text{ cm}^{-1}$  under different storage time; (B) Histogram of SERS intensity of  $1321\text{ cm}^{-1}$  of different storage time.

Table S3 Assignments of Raman and SERS peaks of DT, MG and CV on the substrate

| Molecule | Raman peak position(cm <sup>-1</sup> ) | SERS peak position(cm <sup>-1</sup> ) | Assignment                           |      |
|----------|----------------------------------------|---------------------------------------|--------------------------------------|------|
| DT       | 1062                                   | 1047                                  | CH <sub>3</sub> rocking              | 12   |
|          | 1150                                   | 1131                                  | C-N stretching; C-N bending          |      |
|          | 1333                                   | 1326                                  | Symmetric NO <sub>2</sub> stretching |      |
|          | 1556                                   | 1544                                  | Aromatic ring stretching             |      |
| MG       | 424                                    | 413                                   | C-phenyl out-of-plane                | 2, 3 |
|          | 518                                    | 512                                   | bending                              |      |
|          | 780                                    | 779                                   | C-H out-of-plane bending             |      |
|          | 903                                    | 898                                   | C-H out-of-plane bending             |      |
|          | 1160                                   | 1157                                  | C-H in-plane bending in ring         |      |
|          | 1206                                   | 1202                                  | C-H in-plane bending in ring         |      |
|          | 1579                                   | 1576                                  | N-phenyl stretching bending          |      |
|          | 1602                                   | 1602                                  | Ring C-C stretching vibration        |      |
| CV       | 412                                    | 412                                   | C-N-C bending                        | 13   |
|          | 517                                    | 512                                   | C-N-C bending                        |      |
|          | 711                                    | 711                                   | C-N-C symmetric stretching           |      |
|          | 790                                    | 785                                   | Ring C-H bending                     |      |
|          | 903                                    | 898                                   | Phenyl ring breathing mode           |      |
|          | 1160                                   | 1160                                  | C-phenyl C-H in-plane stretching     |      |
|          | 1575                                   | 1572                                  | Ring C-C stretching                  |      |
|          | 1606                                   | 1604                                  | Ring C-C stretching                  |      |

## Reference

1. Z. H. Li, J. H. Bai, X. Zhang, J. M. Lv, C. S. Fan, Y. M. Zhao, Z. L. Wu and H. J. Xu, *Spectrochim Acta A Mol Biomol Spectrosc*, 2020, **241**, 118532-118539.
2. P. Kumar, R. Khosla, M. Soni, D. Deva and S. K. Sharma, *Sensors and Actuators B: Chemical*, 2017, **246**, 477-486.
3. X. Fei, Z. Liu, Y. Li, G. Yang, C. Su, H. Zhong, Z. Zhuang and Z. Guo, *Journal of Alloys and Compounds*, 2017, **725**, 1084-1090.
4. B. Li, Y. E. Shi, J. Cui, Z. Liu, X. Zhang and J. Zhan, *Analytica Chimica Acta*, 2016, **923**, 66-73.
5. X.-Y. Zhao, G. Wang and M. Hong, *Materials Chemistry and Physics*, 2018, **214**, 377-382.
6. J. Li, Q. Wang, J. Wang, M. Li, X. Zhang, L. Luan, P. Li and W. Xu, *Analytical and Bioanalytical Chemistry*, 2021, **413**, 4207-4215.
7. Z. Wang, Y. Huo, T. Ning, R. Liu, Z. Zha, M. Shafi, C. Li, S. Li, K. Xing, R. Zhang, S. Xu, Z. Li and S. Jiang, *Journal*, 2021, **11**.
8. A. La Porta, M. Grzelczak and L. M. Liz-Marzán, *ChemistryOpen*, 2014, **3**, 146-151.
9. S. Yao, Y. Lv, Q. Wang, J. Yang, H. Li, N. Gao, F. Zhong, J. Fu, J. Tang, T. Wang and D. Jia, *Applied Surface Science*, 2023, **609**, 155098.
10. B. Li, Y.-e. Shi, J. Cui, Z. Liu, X. Zhang and J. Zhan, *Analytica Chimica Acta*, 2016, **923**, 66-73.
11. Z. H. Li, J. H. Bai, X. Zhang, J. M. Lv, C. S. Fan, Y. M. Zhao, Z. L. Wu and H. J. Xu, *Spectrochimica Acta Part A: Molecular and Biomolecular Spectroscopy*, 2020, **241**, 118532.
12. Y. Li, L. Jiang, Y. Zou, Z. Song and S. Jin, *Applied Surface Science*, 2021, **540**, 148381-148389.
13. G. Shi, M. Wang, Y. Zhu, Y. Wang and H. Xu, *Applied Surface Science*, 2018, **459**, 802-811.
